# Supplementary material for: Personalizing HRI in Musical Instrument Practicing: The Influence of Robot Roles (Evaluative Versus Nonevaluative) on the Child’s Motivation for Children in Different Learning Stages
Source: Frontiers journal article supplement (doi:10.3389/frobt.2021.699524), 2021-10-01
Supplement: Data_Sheet_1.PDF [file Data_Sheet_1.PDF]

## Supplementary Material

### 1 SUPPLEMENTARY FIGURES AND TABLES

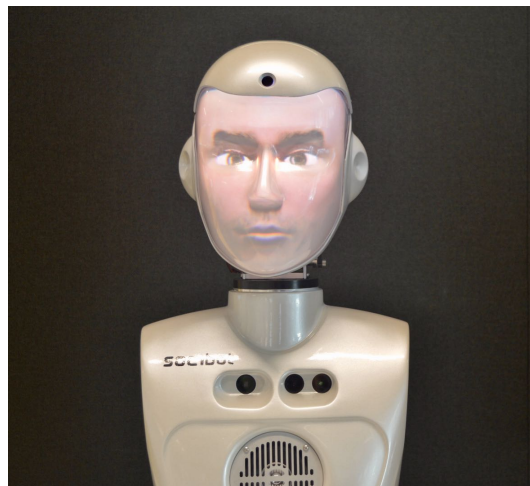

**Figure S1.** The SocibotMini Robot Used in the Current Study.

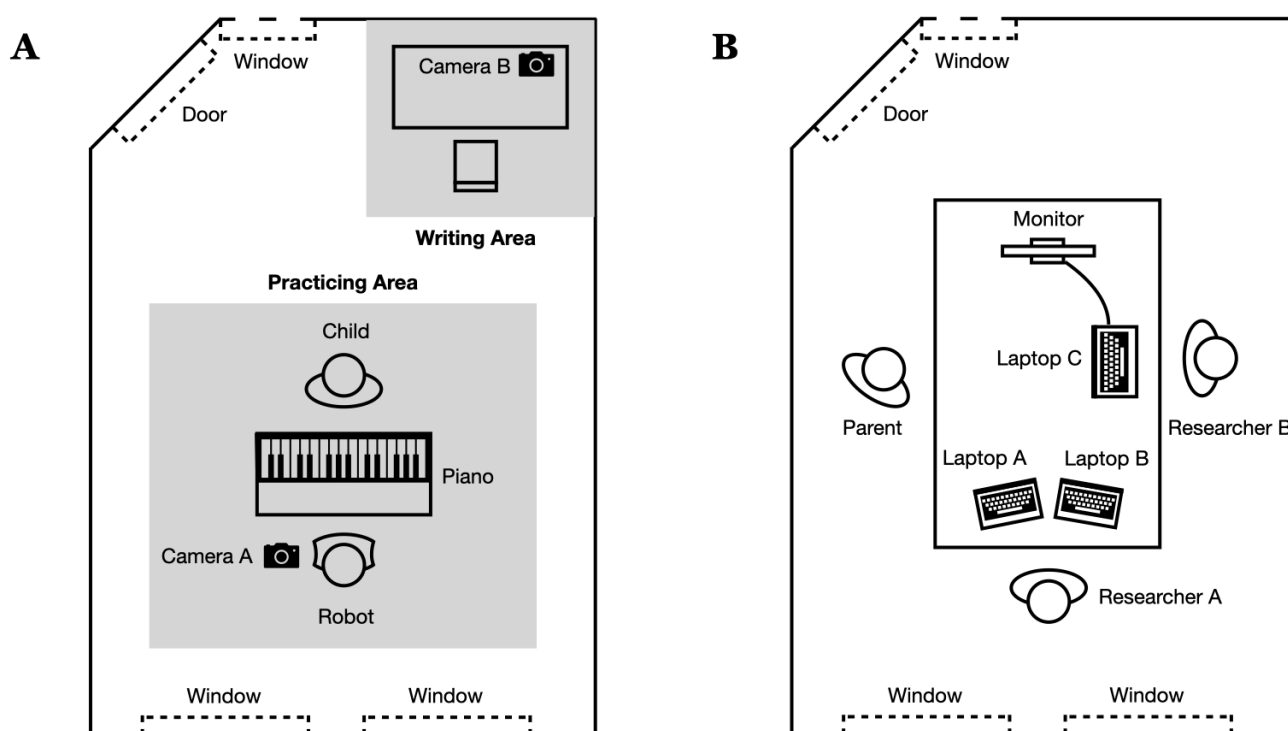

**Figure S2.** Top View Illustration of the Experiment Room (A) and the Control Room (B).

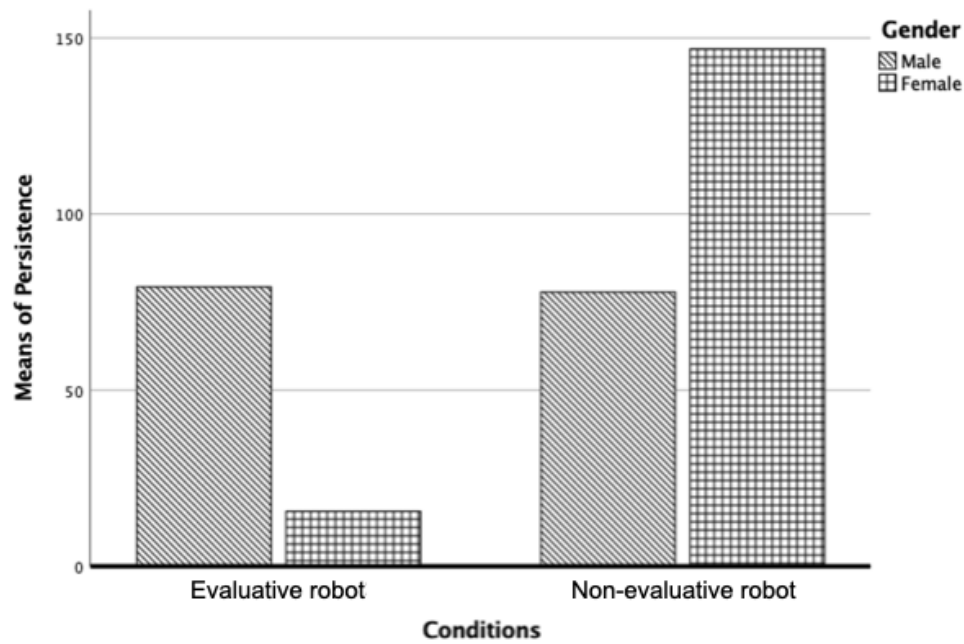

**Figure S3.** Means of persistence of children in different learning stages in the evaluative robot condition and the non-evaluative robot condition.

| Context                  | Tasks                                    | Evaluative robot | Non-evaluative robot |
|--------------------------|------------------------------------------|------------------|----------------------|
| Robot introduction       | Robot self-introduction                  | 1                | 1                    |
|                          | Greeting                                 | 2                | 2                    |
|                          | General task introduction                | 3                | 3                    |
| Practice Session         | General task introduction                | 1                | 1                    |
|                          | Melody order guide                       | 2                | 2                    |
|                          | Verbal feedback for praise               | 3                | 3                    |
|                          | Verbal feedback for stop                 | 1                | 1                    |
|                          | Verbal feedback for playing wrong melody | 1                | 1                    |
|                          | Verbal feedback for questions            | 3                | 3                    |
|                          | Conclusion of the practice               | 1                | 1                    |
| Filling in questionnaire | Ask to fill in                           | 2                | 2                    |
|                          | Ask to take a break                      | 1                | 1                    |

**Table S1.** Numbers of Robot Behaviors for Evaluative Role and Non-evaluative Role in Different Tasks.

| Source | Dimension | Question                                  |
|--------|-----------|-------------------------------------------|
| FunQ   | Autonomy  | I knew what to do.                        |
|        |           | I did this activity because I had to. (r) |
|        |           | I did this activity because I wanted to.  |
| FunQ   | Delight   | I was happy.                              |
|        |           | I had fun.                                |
|        |           | I want to do something like this again.   |
| FunQ   | Stress    | I felt angry. (r)                         |
|        |           | I felt sad. (r)                           |
|        |           | I felt bad. (r)                           |
| SIMS   | Interest  | I could focus easily.                     |
|        |           | I think this practice is important.       |
|        |           | I did this activity because I wanted to.  |

r: reversed items

**Table S2.** Motivation questionnaire questions.

| Category                       | Positive codes and indicators                                                                                                                                                                                          | Negative codes and indicators                                                                                                                                                             |
|--------------------------------|------------------------------------------------------------------------------------------------------------------------------------------------------------------------------------------------------------------------|-------------------------------------------------------------------------------------------------------------------------------------------------------------------------------------------|
| <b>Emotional expressions</b>   | <b>Happiness</b><br>*Laughs/giggles<br>*Grins/ smiles<br>-*Pride                                                                                                                                                       | <b>Sadness</b><br>*Sad Expression<br>*Self-frustration<br><b>Anxiety</b><br>*Anxious expression<br>*Shame/gaze avoidance/face hidden<br>*Confusion/frozen expression                      |
| <b>Task-related behaviors</b>  | <b>Persistence</b><br>-Visual focus point on task<br>*Showing initiative<br>*Application of personal strategies<br><br><b>Help-seeking</b><br>*Verbally, directly and explicitly ask for help                          | <b>Hostility/Reluctance</b><br>*Stop playing<br>*Lean away from piano/leave<br>*Shortcuts<br>*Frustrated verbal remarks<br><b>Off-task</b><br>*Signs of boredom<br>-Visual focus off task |
| <b>Robot-related behaviors</b> | <b>Interest</b><br>-Visual focus on robot<br>*Engaged with robot<br>*Curiosity towards robot<br>*Reply to the robot positively<br>*Follows instructions<br><b>Help-seeking</b><br>*Chats with the robot about the task | <b>Hostility/Reluctance</b><br>*Refuses/hesitates/ignore to follow ro<br>*Verbal remarks “must I really”<br><br><b>Socializing</b><br>*Chats about other topics but the task              |

**Table S3.** Descriptions for Emotion and Task Behavior Codes.

\* Dichotomous nominal code

\* Continuous code

|                    | Alone    |          |           | Non-evaluative robot |          |           | Evaluative robot |          |           |
|--------------------|----------|----------|-----------|----------------------|----------|-----------|------------------|----------|-----------|
|                    | <i>n</i> | <i>M</i> | <i>SD</i> | <i>n</i>             | <i>M</i> | <i>SD</i> | <i>n</i>         | <i>M</i> | <i>SD</i> |
| Beginners          | 11       | 4.40     | 0.40      | 11                   | 4.50     | 0.42      | 11               | 4.43     | 0.29      |
| Developing players | 10       | 4.56     | 0.39      | 10                   | 4.63     | 0.33      | 10               | 4.53     | 0.43      |
| Advanced players   | 10       | 4.07     | 0.97      | 10                   | 4.53     | 0.39      | 10               | 4.65     | 0.56      |
| Total              | 31       | 4.34     | 0.65      | 31                   | 4.55     | 0.37      | 31               | 4.53     | 0.77      |

**Table S4.** Mean and standard deviation of motivation collected by the questionnaire in the alone, non-evaluative robot, and evaluative robot conditions.

|                    | Alone    |          |           | Non-evaluative robot |          |           | Evaluative robot |          |           |
|--------------------|----------|----------|-----------|----------------------|----------|-----------|------------------|----------|-----------|
|                    | <i>n</i> | <i>M</i> | <i>SD</i> | <i>n</i>             | <i>M</i> | <i>SD</i> | <i>n</i>         | <i>M</i> | <i>SD</i> |
| Beginners          | 7        | 4.71     | 2.43      | 7                    | 3.00     | 2.94      | 7                | 3.57     | 1.51      |
| Developing players | 9        | 3.67     | 3.57      | 9                    | 2.11     | 2.57      | 9                | 2.33     | 3.24      |
| Advanced players   | 10       | 2.80     | 2.39      | 10                   | 1.90     | 1.60      | 10               | 0.90     | 1.10      |
| Total              | 26       | 3.62     | 2.86      | 26                   | 2.27     | 2.31      | 26               | 2.12     | 2.36      |

**Table S5.** Mean and standard deviation of motivation measured as persistence collected by the behavior data in the alone, non-evaluative robot, and evaluative robot conditions. Videos with bad quality were not analysed (e.g., incomplete, too much noise, etc.).
